# Supplementary material for: Complex Networks Analyses of Antibiofilm Peptides: An Emerging Tool for Next-Generation Antimicrobials’ Discovery
Source: MDPI journal article supplement (doi:10.3390/antibiotics12040747), 2023-04-13
Supplement: s1 [file s1]

### CLUSTER - 11

|               |   |                   |                 |                 |                   |     |    |
|---------------|---|-------------------|-----------------|-----------------|-------------------|-----|----|
| starPep_00004 | 1 | LLGDFFRKSKEKIGKEF | KRTIVQRTKDFLR   | ---             | NLVPRTES          | --- | 37 |
| starPep_06521 | 1 | -----LAREYK       | KIVEKLRWLR      | ---             | QVLRTRLR          | --- | 24 |
| starPep_03278 | 1 | -----IGKEF        | KRIVERIKRFLR    | ---             | ELVRPLR           | --- | 24 |
| starPep_08394 | 1 | -----ALWKT        | LLKKVL          | ---             | KAYSPWTFN         | --- | 20 |
| starPep_06708 | 1 | -----LWKT         | LLKKVL          | ---             | KAAA              | --- | 14 |
| starPep_09850 | 1 | -----GIWKK        | WIKKWL          | ---             | KLLKKLWKKG        | --- | 22 |
| starPep_00803 | 1 | -----KRFF         | KFFKLLKNSVKKRAK | KFFKKPKVIGVTFFP |                   |     | 34 |
| starPep_10917 | 1 | -----KRFF         | KFFKLLKNSVKKRFK | KFFKKLKVIGVTFFP |                   |     | 34 |
| starPep_04312 | 1 | -----KRAK         | FFKLLKNSVKKRAK  | KFFKKPKVIGVTFFP |                   |     | 11 |
| starPep_04342 | 1 | -----KTKK         | FLKKT           | ---             |                   |     | 10 |
| starPep_10977 | 1 | -----KTKK         | FLKKT           | ---             |                   |     | 10 |
| starPep_00136 | 1 | -----GRF          | KRFKFK          | ---             | KLFKKLSPVIPLHLG   |     | 27 |
| starPep_00084 | 1 | -----RGLRR        | LRGRIAHGVKKYGP  | TVLRIIRIAG      |                   |     | 29 |
| starPep_00514 | 1 | -----KRL          | FKLLFSLR        | ---             | KY                | --- | 14 |
| starPep_03429 | 1 | -----LNL          | ALLAVAK         | ---             | KIL               | --- | 14 |
| starPep_10286 | 1 | -----IGI          | LKLSKLL         | ---             | AL                | --- | 13 |
| starPep_05968 | 1 | -----IKK          | ILSKIK          | ---             | KLLK              | --- | 13 |
| starPep_02848 | 1 | -----RIL          | SILR            | ---             | HQNLLKELQDLAL     |     | 20 |
| starPep_07864 | 1 | -----VLLVT        | TRLHQ           | ---             | RGVYRKRWHFSGRKYR  |     | 28 |
| starPep_03012 | 1 | -----FFG          | TLKLS           | ---             | KLIPGVMKLFSSKKKER |     | 26 |
| starPep_02515 | 1 | -----FFG          | VLKLR           | ---             | KIF               | --- | 13 |
| starPep_00942 | 1 | -----FFG          | SVLKLIP         | ---             | KIL               | --- | 13 |
| starPep_03927 | 1 | -----FLG          | ALFKALS         | ---             |                   |     | 13 |
| starPep_00517 | 1 | -----KWK          | LFKKIG          | ---             | IG                | --- | 20 |
| starPep_00042 | 1 | -----KWK          | LFKKIG          | ---             | AVLKV             | --- | 15 |
| starPep_03322 | 1 | -----KIF          | GAIWPLALGALK    | ---             | NLIK              | --- | 19 |
| starPep_00527 | 1 | -----LLPI         | VGNLLKSL        | ---             |                   |     | 13 |

### MUSCLE

|               |   |                   |                 |                 |                   |     |    |
|---------------|---|-------------------|-----------------|-----------------|-------------------|-----|----|
| starPep_03322 | 1 | -----KIF          | GAIWPLALGALK    | ---             | NLIK              | --- | 19 |
| starPep_06521 | 1 | -----LAREYK       | KIVEKLRWLR      | ---             | QVLRTRLR          | --- | 24 |
| starPep_00004 | 1 | LLGDFFRKSKEKIGKEF | KRTIVQRTKDFLR   | ---             | NLVPRTES          | --- | 37 |
| starPep_03278 | 1 | -----IGKEF        | KRIVERIKRFLR    | ---             | ELVRPLR           | --- | 24 |
| starPep_03429 | 1 | -----LNL          | ALLAVAK         | ---             | KIL               | --- | 14 |
| starPep_07864 | 1 | -----VLLVT        | TRLHQ           | ---             | RGVYRKRWHFSGRKYR  |     | 28 |
| starPep_00942 | 1 | -----FFG          | SVLKLIP         | ---             | KIL               | --- | 13 |
| starPep_02848 | 1 | -----RIL          | SILR            | ---             | HQNLLKELQDLAL     |     | 20 |
| starPep_03927 | 1 | -----FLG          | ALFKALS         | ---             |                   |     | 13 |
| starPep_00084 | 1 | -----RGLRR        | LRGRIAHGVKKYGP  | TVLRIIRIAG      |                   |     | 29 |
| starPep_00527 | 1 | -----LLPI         | VGNLLKSL        | ---             |                   |     | 13 |
| starPep_02515 | 1 | -----FFG          | VLKLR           | ---             | KIF               | --- | 13 |
| starPep_03012 | 1 | -----FFG          | TLKLS           | ---             | KLIPGVMKLFSSKKKER |     | 26 |
| starPep_09850 | 1 | -----GIWKK        | WIKKWL          | ---             | KLLKKLWKKG        | --- | 22 |
| starPep_10917 | 1 | -----KRFF         | KFFKLLKNSVKKRFK | KFFKKLKVIGVTFFP |                   |     | 34 |
| starPep_00803 | 1 | -----KRFF         | KFFKLLKNSVKKRAK | KFFKKPKVIGVTFFP |                   |     | 34 |
| starPep_04312 | 1 | -----KRAK         | FFKLLKNSVKKRAK  | KFFKKPKVIGVTFFP |                   |     | 11 |
| starPep_10977 | 1 | -----KTKK         | FLKKT           | ---             |                   |     | 10 |
| starPep_04342 | 1 | -----KTKK         | FLKKT           | ---             |                   |     | 10 |
| starPep_00136 | 1 | -----GRF          | KRFKFK          | ---             | KLFKKLSPVIPLHLG   |     | 27 |
| starPep_00514 | 1 | -----KRL          | FKLLFSLR        | ---             | KY                | --- | 14 |
| starPep_03429 | 1 | -----LNL          | ALLAVAK         | ---             | KIL               | --- | 14 |
| starPep_10286 | 1 | -----IGI          | LKLSKLL         | ---             | AL                | --- | 13 |
| starPep_05968 | 1 | -----IKK          | ILSKIK          | ---             | KLLK              | --- | 13 |
| starPep_02848 | 1 | -----RIL          | SILR            | ---             | HQNLLKELQDLAL     |     | 20 |
| starPep_07864 | 1 | -----VLLVT        | TRLHQ           | ---             | RGVYRKRWHFSGRKYR  |     | 28 |
| starPep_03012 | 1 | -----FFG          | TLKLS           | ---             | KLIPGVMKLFSSKKKER |     | 26 |
| starPep_02515 | 1 | -----FFG          | VLKLR           | ---             | KIF               | --- | 13 |
| starPep_00942 | 1 | -----FFG          | SVLKLIP         | ---             | KIL               | --- | 13 |
| starPep_03927 | 1 | -----FLG          | ALFKALS         | ---             |                   |     | 13 |
| starPep_00517 | 1 | -----KWK          | LFKKIG          | ---             | IG                | --- | 20 |
| starPep_00042 | 1 | -----KWK          | LFKKIG          | ---             | AVLKV             | --- | 15 |
| starPep_05968 | 1 | -----KIF          | GAIWPLALGALK    | ---             | NLIK              | --- | 19 |
| starPep_00517 | 1 | -----LLPI         | VGNLLKSL        | ---             |                   |     | 13 |
| starPep_00042 | 1 | -----KWK          | LFKKIG          | ---             | AVLKV             | --- | 15 |

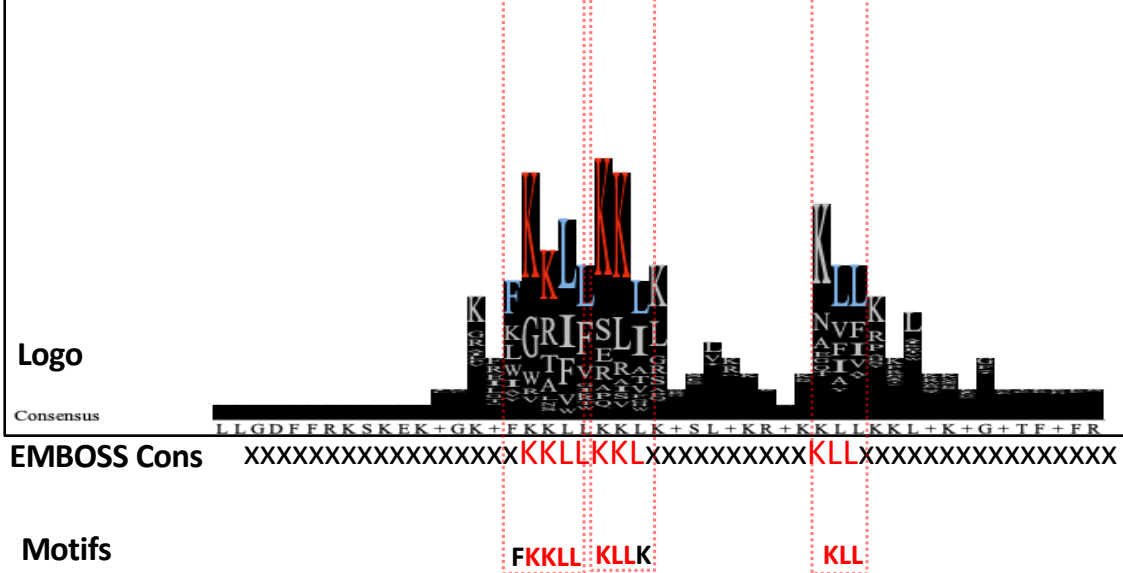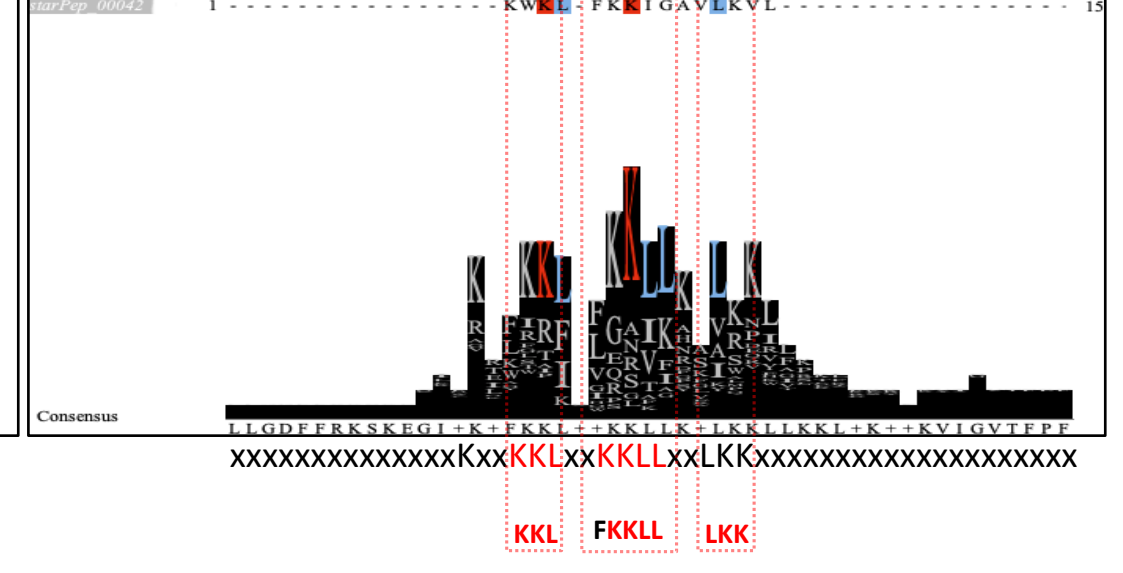

# MAFFT

# CLUSTER - 14

# MUSCLE

|                      |   |   |   |   |   |   |   |   |   |   |   |   |   |   |   |
|----------------------|---|---|---|---|---|---|---|---|---|---|---|---|---|---|---|
| <i>starPep_02909</i> | 1 | V | R | L | R | I | R | V | A | V | I | R | K | - | - |
| <i>starPep_02906</i> | 1 | V | Q | L | R | I | R | V | A | V | I | R | A | - | - |
| <i>starPep_02910</i> | 1 | V | R | L | R | I | R | V | A | V | R | R | A | - | - |
| <i>starPep_04316</i> | 1 | K | R | F | R | I | R | V | A | V | R | R | A | - | - |
| <i>starPep_02700</i> | 1 | K | R | F | R | I | R | V | R | V | I | R | K | - | - |
| <i>starPep_10965</i> | 1 | K | R | W | R | I | R | V | R | V | I | R | K | C | - |
| <i>starPep_07894</i> | 1 | V | Q | W | R | I | R | V | R | V | I | K | K | - | - |
| <i>starPep_13500</i> | 1 | V | Q | F | R | I | R | V | R | I | V | I | R | K | - |
| <i>starPep_06111</i> | 1 | I | R | V | K | I | R | V | K | - | I | R | V | K | - |
| <i>starPep_06108</i> | 1 | I | R | I | K | I | R | I | K | - | - | - | - | - | - |
| <i>starPep_07893</i> | 1 | V | Q | W | R | A | I | R | V | R | V | I | R | - | - |
| <i>starPep_13504</i> | 1 | V | Q | L | R | A | I | R | V | R | V | I | R | - | - |
| <i>starPep_04853</i> | 1 | - | - | - | W | K | K | I | R | V | R | L | S | A | - |
| <i>starPep_11008</i> | 1 | - | - | - | K | W | K | I | R | V | R | L | S | A | - |
| <i>starPep_07412</i> | 1 | - | - | - | R | F | W | K | V | R | V | K | - | I | R |
| <i>starPep_01564</i> | 1 | - | - | - | R | L | - | A | R | I | V | - | V | I | R |
| <i>starPep_00379</i> | 1 | - | - | - | R | L | - | C | R | I | V | - | V | I | R |
| <i>starPep_12527</i> | 1 | - | - | - | R | I | - | V | R | V | R | - | A | I | R |
| <i>starPep_12528</i> | 1 | - | - | - | R | I | - | V | R | V | R | - | I | A | R |
| <i>starPep_13515</i> | 1 | V | R | L | - | - | I | R | A | V | R | A | R | V | - |
| <i>starPep_13528</i> | 1 | V | R | W | - | - | A | R | V | A | R | I | L | R | V |
| <i>starPep_08271</i> | 1 | A | F | K | A | F | W | K | F | V | K | F | V | K | - |
| <i>starPep_11001</i> | 1 | - | - | - | K | W | F | W | K | F | V | K | F | V | K |

|                      |   |   |   |   |   |   |   |   |   |   |   |   |   |   |   |   |   |   |    |
|----------------------|---|---|---|---|---|---|---|---|---|---|---|---|---|---|---|---|---|---|----|
| <i>starPep_06111</i> | 1 | - | - | - | I | R | V | K | I | R | V | K | I | R | V | K | - | - | 12 |
| <i>starPep_06108</i> | 1 | - | - | - | I | R | I | K | I | R | - | I | K | - | - | - | - | - | 8  |
| <i>starPep_13528</i> | 1 | - | - | - | V | R | W | A | R | V | - | A | R | I | L | R | V | - | 12 |
| <i>starPep_08271</i> | 1 | A | F | K | A | F | W | K | F | V | K | F | V | K | - | - | - | - | 13 |
| <i>starPep_11001</i> | 1 | - | - | - | K | W | F | W | K | F | V | K | F | V | K | - | - | - | 11 |
| <i>starPep_04853</i> | 1 | - | - | - | - | W | K | K | I | R | V | R | L | S | A | - | - | - | 10 |
| <i>starPep_11008</i> | 1 | - | - | - | - | K | W | K | I | R | V | R | L | S | A | - | - | - | 10 |
| <i>starPep_07412</i> | 1 | - | - | - | R | F | W | K | V | R | V | K | - | I | R | F | - | - | 12 |
| <i>starPep_13515</i> | 1 | - | - | - | - | V | R | L | I | R | A | V | R | A | R | V | - | - | 12 |
| <i>starPep_13500</i> | 1 | - | - | - | V | Q | F | R | I | R | V | R | I | V | I | R | K | - | 13 |
| <i>starPep_01564</i> | 1 | - | - | - | R | L | A | R | I | V | V | - | I | R | V | A | R | - | 12 |
| <i>starPep_00379</i> | 1 | - | - | - | R | L | C | R | E | V | V | - | I | R | V | C | R | - | 12 |
| <i>starPep_02700</i> | 1 | - | - | - | K | R | F | R | I | R | V | R | V | I | R | K | - | - | 12 |
| <i>starPep_10965</i> | 1 | - | - | - | K | R | W | R | I | R | V | R | V | I | R | K | C | - | 13 |
| <i>starPep_04316</i> | 1 | - | - | - | K | R | F | R | I | R | V | A | V | R | R | A | - | - | 12 |
| <i>starPep_02910</i> | 1 | - | - | - | V | R | L | I | R | V | A | V | R | R | A | - | - | - | 12 |
| <i>starPep_02909</i> | 1 | - | - | - | V | R | L | R | I | R | V | A | V | I | R | K | - | - | 12 |
| <i>starPep_02906</i> | 1 | - | - | - | V | Q | L | R | I | R | V | A | V | I | R | A | - | - | 12 |
| <i>starPep_07894</i> | 1 | - | - | - | V | Q | W | R | I | R | V | R | V | I | K | K | - | - | 12 |
| <i>starPep_07893</i> | 1 | - | - | - | V | Q | W | R | A | I | R | V | R | V | I | R | - | - | 12 |
| <i>starPep_13504</i> | 1 | - | - | - | V | Q | L | R | A | I | R | V | R | V | I | R | - | - | 12 |
| <i>starPep_12527</i> | 1 | - | - | - | - | R | I | V | R | V | R | A | I | R | W | Q | V | - | 12 |
| <i>starPep_12528</i> | 1 | - | - | - | - | R | I | V | R | V | R | I | A | R | L | Q | V | - | 12 |

Logo

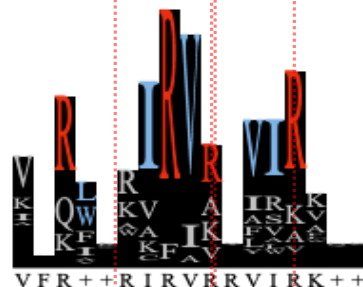

EMBOSS Cons

xxRxxRIRVRxVIRxxx

Motifs

RIPVR RIVR

Consensus

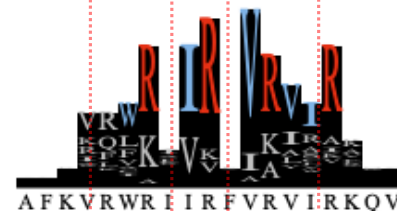

xxxxRWRxIRxVRVIRxxx

R[WL]R

VRVIR

# MAFFT

# CLUSTER - 15

# MUSCLE

|               |   |                       |            |         |
|---------------|---|-----------------------|------------|---------|
| starPep_07411 | 1 | -----RFRRLFRTRV       | RVLKKI     | -----16 |
| starPep_12469 | 1 | -----RFKRVARVW        | -----10    |         |
| starPep_08958 | 1 | -----CVNWKKILGKII     | KVVK       | -----16 |
| starPep_10445 | 1 | -----IRWRIRVWVR       | RIC        | -----13 |
| starPep_13505 | 1 | -----VQLRRIRVWVI      | R          | -----12 |
| starPep_07895 | 1 | -----VQWRRIRVWVI      | R          | -----12 |
| starPep_13405 | 1 | -----VFWRRI RVWVI     | R          | -----12 |
| starPep_13404 | 1 | -----VFLRRIRVVI       | R          | -----12 |
| starPep_05949 | 1 | -----IFWRRIVIK        | KF         | -----12 |
| starPep_12770 | 1 | -----RRWIRVAVIL       | RV         | -----12 |
| starPep_12529 | 1 | -----RIVWVIRRLQV      | -----12    |         |
| starPep_12531 | 1 | -----RIVWVIRRWQV      | -----12    |         |
| starPep_12530 | 1 | -----RIVWVIRRFV       | -----12    |         |
| starPep_12525 | 1 | -----RIVIVIRRLFV      | -----12    |         |
| starPep_09517 | 1 | -----FKKVI VIRRWF I   | -----12    |         |
| starPep_02908 | 1 | -----VRLIVAV          | RIWRR      | -----12 |
| starPep_13517 | 1 | -----VRLIVAV          | RIWRR      | -----12 |
| starPep_06382 | 1 | -----KRWRWIV          | RNI RR     | -----12 |
| starPep_12523 | 1 | -----RI-RWIL          | RYWRWS     | -----12 |
| starPep_10594 | 1 | -----KI-KWIL          | KYWKWS     | -----12 |
| starPep_10922 | 1 | -----KRIRWVI          | LWRQV      | -----12 |
| starPep_13644 | 1 | -----WIV              | VIWRRKRRRC | 13      |
| starPep_02907 | 1 | -----VQRWLVWR         | IRK        | -----12 |
| starPep_07634 | 1 | -----RIRWVWR          | IRVQRR     | -----12 |
| starPep_07901 | 1 | -----VRLRIRWVWL       | RK         | -----12 |
| starPep_00000 | 1 | GIGAVLKVLTTGLPALISWIK | RKRQQ      | -----26 |

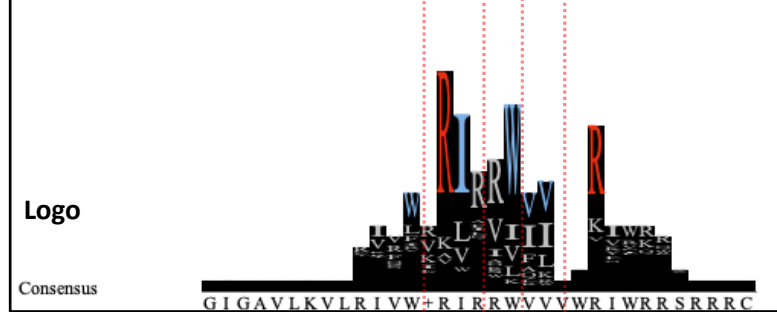

EMBOSS Cons xxxxxxxxxxxxxxRlxrWVvxRxxxxxxxxxx

Motifs  
RIRRW  
WVV

|               |   |                            |         |
|---------------|---|----------------------------|---------|
| starPep_08958 | 1 | -----CVNWKKILGKIIKVVK      | -----16 |
| starPep_07411 | 1 | -----RFRRLFRIRVRVLKKI      | 16      |
| starPep_12469 | 1 | -----RFKRVARVW             | -----10 |
| starPep_00000 | 1 | GIGAVLKVLTTGLPALISWIKRKRQQ | 26      |
| starPep_02908 | 1 | -----VRLIVAVRIRWR          | -----12 |
| starPep_13517 | 1 | -----VRLIVAVRIRWR          | -----12 |
| starPep_12770 | 1 | -----RRWIRVAVIRLV          | -----12 |
| starPep_06382 | 1 | -----KRWRWIVRNIR           | -----12 |
| starPep_05949 | 1 | -----IFWRRIVIVKKF          | -----12 |
| starPep_07634 | 1 | -----RRWVWRIVQRR           | -----12 |
| starPep_13644 | 1 | -----WIVVIRRRKRRRC         | 13      |
| starPep_10922 | 1 | -----KRIRWVILWRQV          | 12      |
| starPep_12525 | 1 | -----RIVIVRIRRLFV          | 12      |
| starPep_12529 | 1 | -----RIVWVIRRLQV           | 12      |
| starPep_12531 | 1 | -----RIVWVIRRWQV           | 12      |
| starPep_12530 | 1 | -----RIVWVIRRFV            | 12      |
| starPep_07901 | 1 | -----VRLRIRWVWLK           | -----12 |
| starPep_09517 | 1 | -----FKKVI VIRRWF I        | 12      |
| starPep_02907 | 1 | -----VQRWLIVWRIRK          | -----12 |
| starPep_10445 | 1 | -----IRWRIRVWVRIC          | -----13 |
| starPep_13505 | 1 | -----VQLRRIRVWVIR          | -----12 |
| starPep_07895 | 1 | -----VQWRRIRVWVIR          | -----12 |
| starPep_13405 | 1 | -----VFWRRI RVWVI R        | -----12 |
| starPep_10594 | 1 | -----KIKWILKYWKWS          | 12      |
| starPep_13404 | 1 | -----VFLRRIRVIVIR          | -----12 |
| starPep_12523 | 1 | -----RIRWILRYWRWS          | 12      |

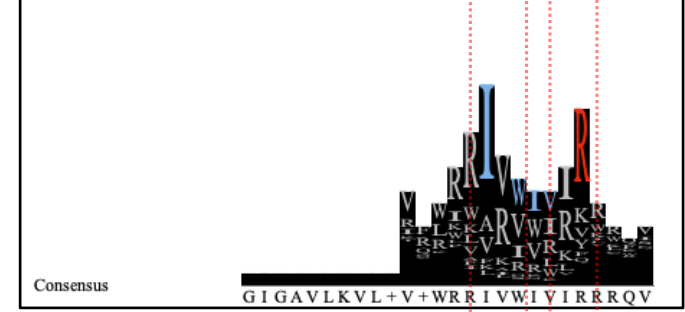

EMBOSS Cons xxxxxxxxxxxxxxRlxxIlxRxxxx

Motifs  
RIRIR  
RI[VR]W

# MAFFT

# CLUSTER - 17

# MUSCLE

|               |   |                                                                                                                                                                                                   |    |
|---------------|---|---------------------------------------------------------------------------------------------------------------------------------------------------------------------------------------------------|----|
| starPep_00025 | 1 | -----FKC-RR <b>W</b> QWR-MKK <b>L</b> GAP SITCVRRAF---                                                                                                                                            | 25 |
| starPep_02379 | 1 | -----RF-GR <b>F</b> LRRK-IRRFRPKVTITIQGSARFG                                                                                                                                                      | 27 |
| starPep_04734 | 1 | -----RW-GR <b>W</b> LRRK-IRRWRPK-----                                                                                                                                                             | 15 |
| starPep_04737 | 1 | -----RW-KR <b>W</b> WRR-KK-----                                                                                                                                                                   | 10 |
| starPep_04678 | 1 | -----RK-KR <b>W</b> WRR-KK-----                                                                                                                                                                   | 10 |
| starPep_05137 | 1 | -----CWF <b>W</b> KWRR-RRR-----                                                                                                                                                                   | 12 |
| starPep_02702 | 1 | -----KR <b>W</b> -KW <b>W</b> RR-C-----                                                                                                                                                           | 10 |
| starPep_04101 | 1 | -----GR <b>W</b> -KR <b>W</b> RKK-WKK <b>L</b> WKKLS-----                                                                                                                                         | 18 |
| starPep_08392 | 1 | -----AL <b>W</b> KEV-LKNAGKAALNEINNLV---                                                                                                                                                          | 22 |
| starPep_03602 | 1 | -----RKS <b>Y</b> KALHKRAR-----                                                                                                                                                                   | 12 |
| starPep_11067 | 1 | -----LA <b>A</b> KLTKA-ATK <b>L</b> TAALTKLAAALT---                                                                                                                                               | 24 |
| starPep_03792 | 1 | -----ASH <b>L</b> GHHALDHLLK-----                                                                                                                                                                 | 14 |
| starPep_00103 | 1 | -----DSHAKRHHGY-KR <b>K</b> FHEKHHSHRGY---                                                                                                                                                        | 24 |
| starPep_00522 | 1 | -----LAHQ <b>K</b> PFIRK-S <b>Y</b> KLHKRCR-----                                                                                                                                                  | 20 |
| starPep_07526 | 1 | -----RPA <b>F</b> RKA <b>A</b> FRVMRACV---                                                                                                                                                        | 16 |
| starPep_00145 | 1 | -----KW <b>C</b> FRVCYR <b>G</b> IC <b>Y</b> RKCR-----                                                                                                                                            | 17 |
| starPep_02430 | 1 | -----W <b>K</b> LLS <b>K</b> AQ <b>E</b> K <b>F</b> G <b>K</b> N <b>K</b> SR-----                                                                                                                 | 17 |
| starPep_09905 | 1 | GLK <b>L</b> R <b>F</b> E <b>F</b> S <b>K</b> I <b>K</b> G <b>E</b> F <b>L</b> K <b>T</b> P <b>E</b> V <b>R</b> F <b>R</b> D <b>I</b> K <b>L</b> K <b>D</b> N <b>R</b> I <b>S</b> V <b>Q</b> R--- | 37 |
| starPep_03008 | 1 | E-----VAS <b>F</b> DK <b>S</b> KLK-----                                                                                                                                                           | 11 |
| starPep_11826 | 1 | -----MLC <b>V</b> -L <b>Q</b> G <b>L</b> REGG-----                                                                                                                                                | 12 |
| starPep_11825 | 1 | -----MLC <b>V</b> -L <b>Q</b> G <b>L</b> REC-----                                                                                                                                                 | 11 |
| starPep_01143 | 1 | -----LMC <b>T</b> HP <b>L</b> DCSN-----                                                                                                                                                           | 11 |
| starPep_09259 | 1 | -----EL <b>R</b> L <b>V</b> CM <b>G</b> Q <b>L</b> -----                                                                                                                                          | 10 |

|               |   |                                                                                                                                                                                                   |    |
|---------------|---|---------------------------------------------------------------------------------------------------------------------------------------------------------------------------------------------------|----|
| starPep_00025 | 1 | -----FKC <b>R</b> R <b>W</b> QWRM <b>K</b> L <b>G</b> A <b>P</b> S <b>I</b> T <b>C</b> V <b>R</b> R <b>A</b> F---                                                                                 | 25 |
| starPep_00103 | 1 | -----D <b>S</b> HAKRHHGYKR <b>K</b> FHEKHHSHRGY---                                                                                                                                                | 24 |
| starPep_00522 | 1 | -----LAHQ <b>K</b> PFIRK <b>S</b> Y <b>K</b> L <b>H</b> K <b>R</b> C <b>R</b> -----                                                                                                               | 20 |
| starPep_03602 | 1 | -----R <b>K</b> S <b>Y</b> KAL <b>H</b> K <b>R</b> A <b>R</b> -----                                                                                                                               | 12 |
| starPep_02379 | 1 | -----R <b>F</b> GR <b>F</b> L <b>R</b> K <b>I</b> R <b>R</b> FRPKVTITIQGSARFG                                                                                                                     | 27 |
| starPep_04734 | 1 | -----R <b>W</b> GR <b>W</b> L <b>R</b> K <b>I</b> R <b>R</b> WRPK-----                                                                                                                            | 15 |
| starPep_04101 | 1 | -----G <b>R</b> W <b>K</b> R <b>W</b> R <b>K</b> K <b>W</b> K <b>L</b> W <b>K</b> K <b>L</b> S-----                                                                                               | 18 |
| starPep_04737 | 1 | -----R <b>W</b> KR <b>W</b> WRR <b>K</b> -----                                                                                                                                                    | 10 |
| starPep_04678 | 1 | -----R <b>K</b> KR <b>W</b> WRR <b>K</b> -----                                                                                                                                                    | 10 |
| starPep_02702 | 1 | -----K <b>R</b> W <b>W</b> K <b>W</b> WRR <b>C</b> -----                                                                                                                                          | 10 |
| starPep_05137 | 1 | -----C <b>W</b> F <b>W</b> K <b>W</b> WRRR <b>R</b> -----                                                                                                                                         | 12 |
| starPep_11826 | 1 | -----M <b>L</b> C <b>V</b> L <b>Q</b> G <b>L</b> REGG-----                                                                                                                                        | 12 |
| starPep_11825 | 1 | -----M <b>L</b> C <b>V</b> L <b>Q</b> G <b>L</b> REC-----                                                                                                                                         | 11 |
| starPep_09259 | 1 | -----E <b>L</b> R <b>L</b> V <b>C</b> M <b>G</b> Q <b>L</b> -----                                                                                                                                 | 10 |
| starPep_01143 | 1 | -----L <b>M</b> C <b>T</b> HP <b>L</b> DCSN-----                                                                                                                                                  | 11 |
| starPep_03008 | 1 | -----E <b>V</b> A <b>S</b> F <b>D</b> K <b>S</b> KLK-----                                                                                                                                         | 11 |
| starPep_03792 | 1 | -----A <b>S</b> H <b>L</b> G <b>H</b> H <b>A</b> L <b>D</b> H <b>L</b> L <b>K</b> -----                                                                                                           | 14 |
| starPep_11067 | 1 | -----L <b>A</b> A <b>K</b> L <b>T</b> K <b>A</b> A <b>T</b> K <b>L</b> T <b>A</b> A <b>L</b> T <b>K</b> L <b>A</b> A <b>A</b> L <b>T</b> ---                                                      | 24 |
| starPep_09905 | 1 | GLK <b>L</b> R <b>F</b> E <b>F</b> S <b>K</b> I <b>K</b> G <b>E</b> F <b>L</b> K <b>T</b> P <b>E</b> V <b>R</b> F <b>R</b> D <b>I</b> K <b>L</b> K <b>D</b> N <b>R</b> I <b>S</b> V <b>Q</b> R--- | 37 |
| starPep_08392 | 1 | -----A <b>L</b> W <b>K</b> E <b>V</b> L <b>K</b> N <b>A</b> G <b>K</b> A <b>L</b> N <b>E</b> I <b>N</b> N <b>L</b> V---                                                                           | 22 |
| starPep_07526 | 1 | -----R <b>P</b> A <b>F</b> R <b>K</b> A <b>A</b> FRVMRACV---                                                                                                                                      | 16 |
| starPep_02430 | 1 | -----W <b>K</b> LLS <b>K</b> AQ <b>E</b> K <b>F</b> G <b>K</b> N <b>K</b> SR-----                                                                                                                 | 17 |
| starPep_00145 | 1 | -----K <b>W</b> -C <b>F</b> R <b>V</b> C <b>Y</b> R <b>G</b> I <b>C</b> YR <b>K</b> C <b>R</b> -----                                                                                              | 17 |

Logo

Consensus

+LKLRFEF+RWAKRWLRK**C**L**K**L**R**K**K**+LRHIRA+V++G

XXXXXXXXXXXXXXXXXX**R**XXX**K**XXXXXXXXXXXXXXXXXXXX

**WLRK** **KKL**

Consensus

GLKL+++++++R**K**R**W**K**W**L**K**R**R**K**L**G**K**K**R**+++G++R**F**G

XXXXXXXXXXXXXXXXXX**W**XXX**K**R**X**R**K**XXXXXXXXXXXXXXXXXXXX

**RWK** **KR[AKL]RK**

EMBOSS Cons

Motifs

### MAFFT

### CLUSTER - 22

### MUSCLE

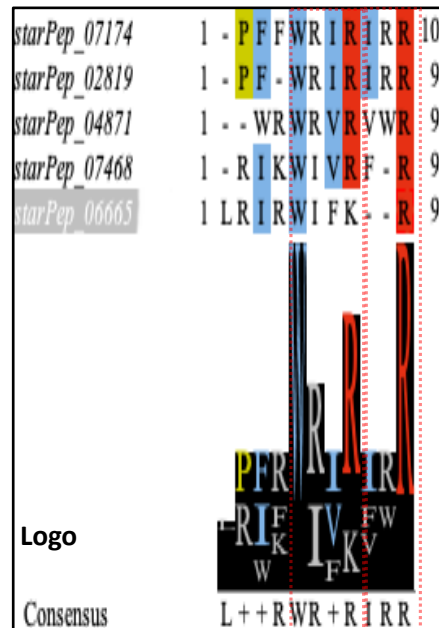

EMBOSS Cons xx**FRWRIRIxR**

Motifs **WRIR IRR**  
**FRWRI**

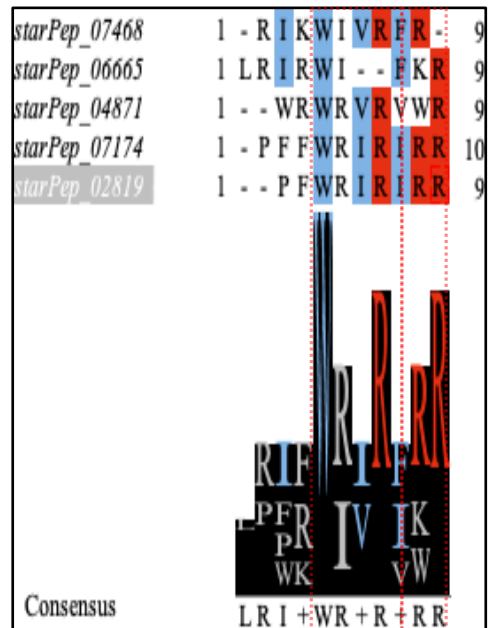

xxx**RWRVRIRR**

**WRVR IRR**  
**RWRVR**



# MAFFT

|                      |   |                                                |    |
|----------------------|---|------------------------------------------------|----|
| <i>starPep_02400</i> | 1 | -----RWRWRWRW-----                             | 8  |
| <i>starPep_08001</i> | 1 | -----WWWLRKIW-----                             | 8  |
| <i>starPep_10637</i> | 1 | -----K K K K K K K K K K A A F A A W A A F A A | 21 |
| <i>starPep_14812</i> | 1 | -----AKRXXGYKRKFXX-----                        | 13 |
| <i>starPep_02281</i> | 1 | -----KKVVFVKVFK-----                           | 10 |
| <i>starPep_06255</i> | 1 | -----KKVVFVWVKFK-----                          | 10 |
| <i>starPep_16445</i> | 1 | -----CGG---LLLFLKKRKRKY-----                   | 17 |
| <i>starPep_18706</i> | 1 | EHFAYGGAXHYQFP SVKXFXKRQX                      | 24 |
| <i>starPep_00002</i> | 1 | -----ILPWKWPWWPWR-----                         | 13 |
| <i>starPep_02383</i> | 1 | -----RIWVIWRR-----                             | 8  |
| <i>starPep_05447</i> | 1 | -----FWRRFWR-----                              | 8  |
| <i>starPep_04044</i> | 1 | -----GKI IKL KASLKL-----                       | 13 |
| <i>starPep_09989</i> | 1 | -----GQI INLK-----                             | 7  |
| <i>starPep_05964</i> | 1 | -----IKIKIKIK-----                             | 8  |
| <i>starPep_03693</i> | 1 | -----VKLFPVKLFP-----                           | 10 |
| <i>starPep_06358</i> | 1 | -----KQFRIRVRV-----                            | 9  |
| <i>starPep_02730</i> | 1 | -----LKLKLLKLLKLL-----                         | 15 |
| <i>starPep_05305</i> | 1 | -----FHFFHFFHFFHFF-----                        | 14 |
| <i>starPep_09934</i> | 1 | -----GLLWHLHLLHLLH-----                        | 12 |
| <i>starPep_00739</i> | 1 | -----GRRRRRSVQWCA-----                         | 11 |

## Logo

Consensus

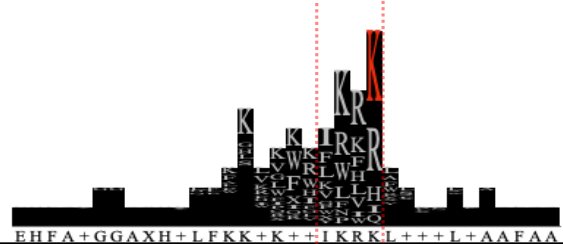

EMBOSS Cons XXXXXXXXXXXXXXXXXXXXIKRXXXXXXXXXXXX

## Motifs

IKRK

# SINGLETONS

|                      |   |                                                |    |
|----------------------|---|------------------------------------------------|----|
| <i>starPep_00739</i> | 1 | --GRRRRRSVQWCA-----                            | 11 |
| <i>starPep_18706</i> | 1 | EHFAYGGAXHYQFP SVKXFXKRQX                      | 24 |
| <i>starPep_02383</i> | 1 | -----RIWVIWRR-----                             | 8  |
| <i>starPep_08001</i> | 1 | -----WWWLRKIW-----                             | 8  |
| <i>starPep_06358</i> | 1 | -----KQFRIRVRV-----                            | 9  |
| <i>starPep_00002</i> | 1 | ILPWKWPWWPWR-----                              | 13 |
| <i>starPep_02400</i> | 1 | -----RWRWRWRW-----                             | 8  |
| <i>starPep_05447</i> | 1 | -----FWRRFWR-----                              | 8  |
| <i>starPep_09989</i> | 1 | -----GQI INLK-----                             | 7  |
| <i>starPep_03693</i> | 1 | -----VKLFPVKLFP-----                           | 10 |
| <i>starPep_04044</i> | 1 | -----GKI IKL KASLKL-----                       | 13 |
| <i>starPep_14812</i> | 1 | -----AKRXXGYKRKFXX-----                        | 13 |
| <i>starPep_02281</i> | 1 | -----KKVVFVKVFK-----                           | 10 |
| <i>starPep_06255</i> | 1 | -----KKVVFVWVKFK-----                          | 10 |
| <i>starPep_05964</i> | 1 | -----IKIKIKIK-----                             | 8  |
| <i>starPep_10637</i> | 1 | -----K K K K K K K K K K A A F A A W A A F A A | 21 |
| <i>starPep_16445</i> | 1 | -----CGLLLLFLKLRKRKY-----                      | 17 |
| <i>starPep_05305</i> | 1 | -----FHFFHFFHFFHFF-----                        | 14 |
| <i>starPep_02730</i> | 1 | -----LKLKLLKLLKLL-----                         | 15 |
| <i>starPep_09934</i> | 1 | -----GLLWHLHLLHLLH-----                        | 12 |

Consensus

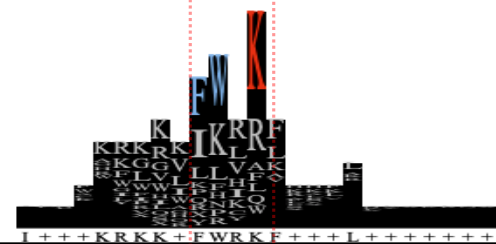

XXXXXXXXXXXXXKXXXXXXXXXXXX

[F][KW]RK

# MUSCLE

### Local Alignment

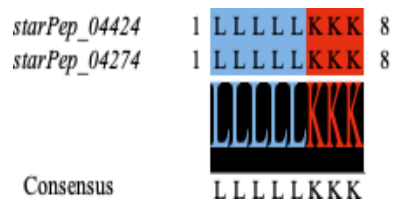

Cluster 6

Motifs

LLLLLKKK

### Global Alignment

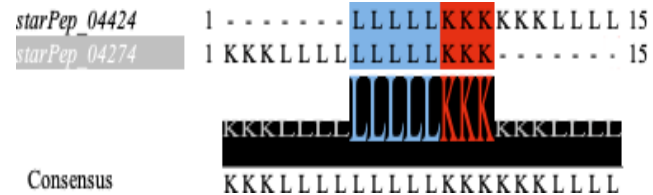

Cluster 28

Motifs

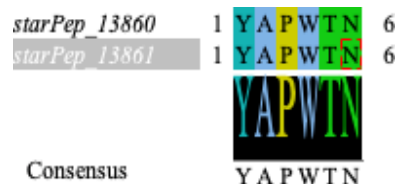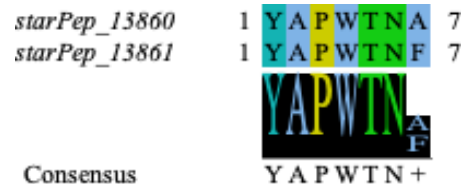

YAPWYN
