# Supplementary figures and images for: Complex Networks Analyses of Antibiofilm Peptides: An Emerging Tool for Next-Generation Antimicrobials’ Discovery
Source: MDPI journal article supplement (doi:10.3390/antibiotics12040747), 2023-04-13

Cutoff=0.45

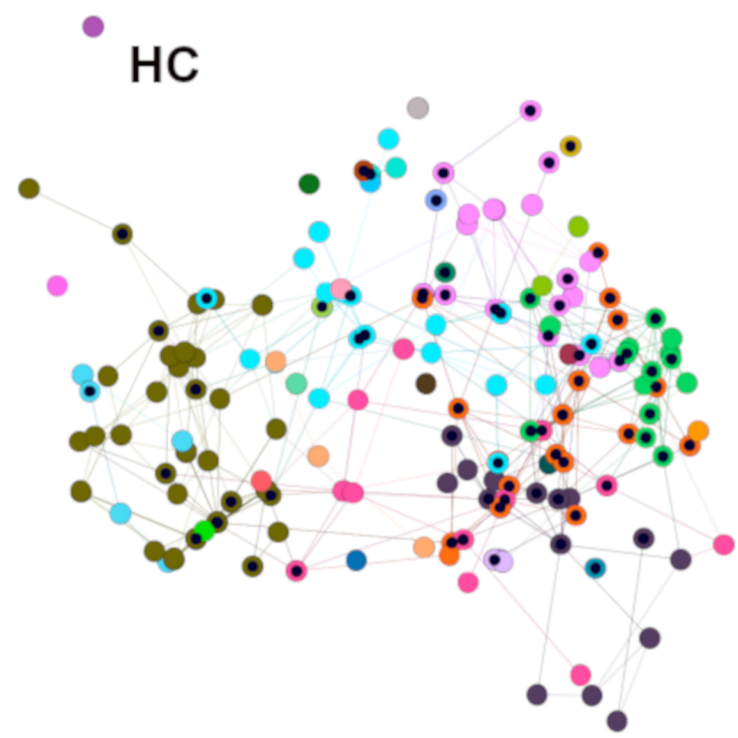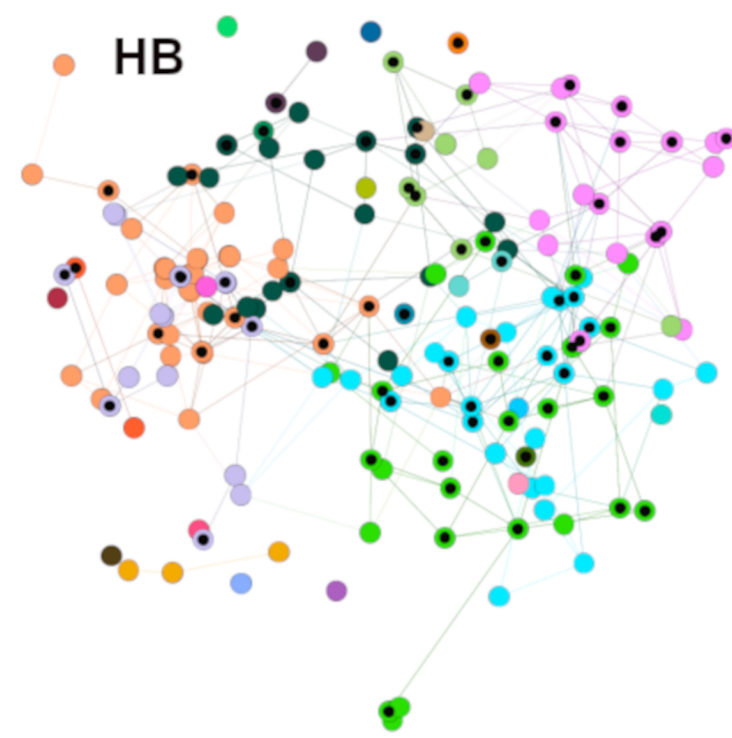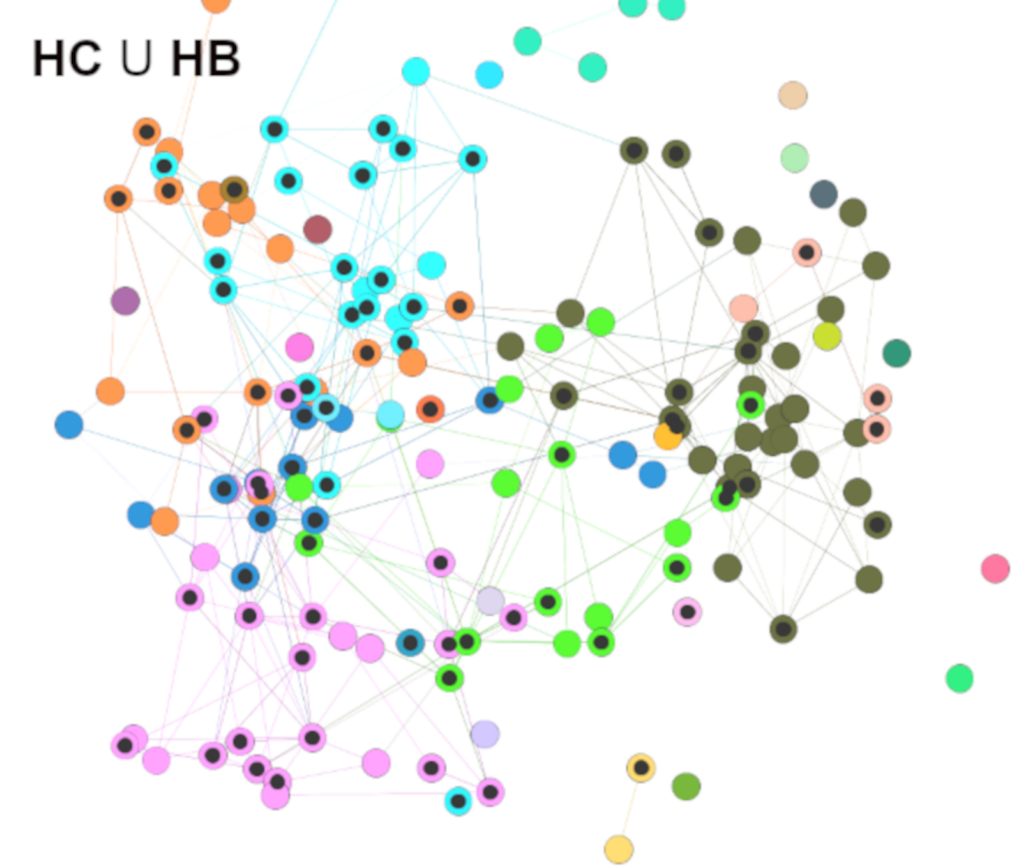

Cutoff=0.40

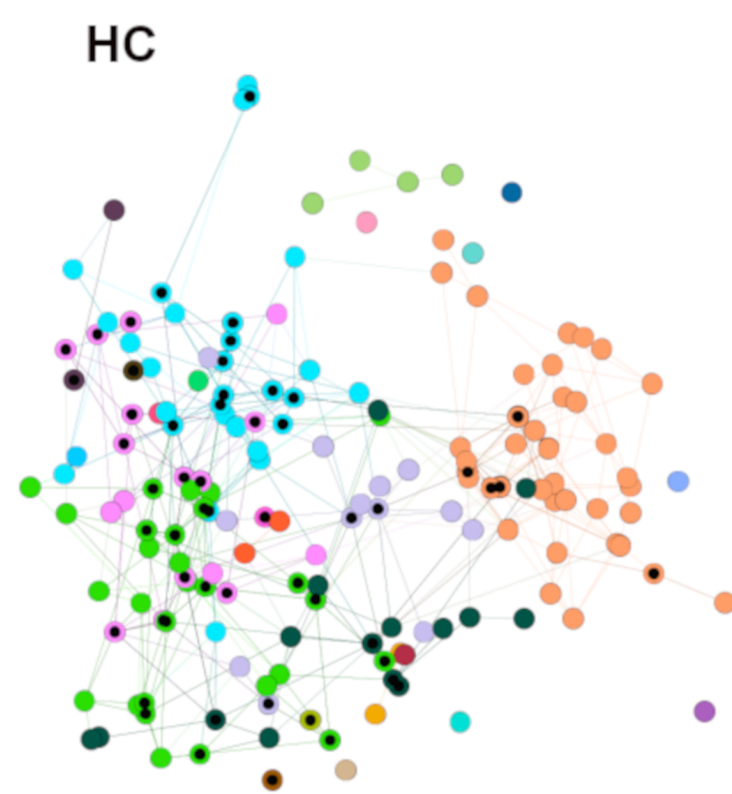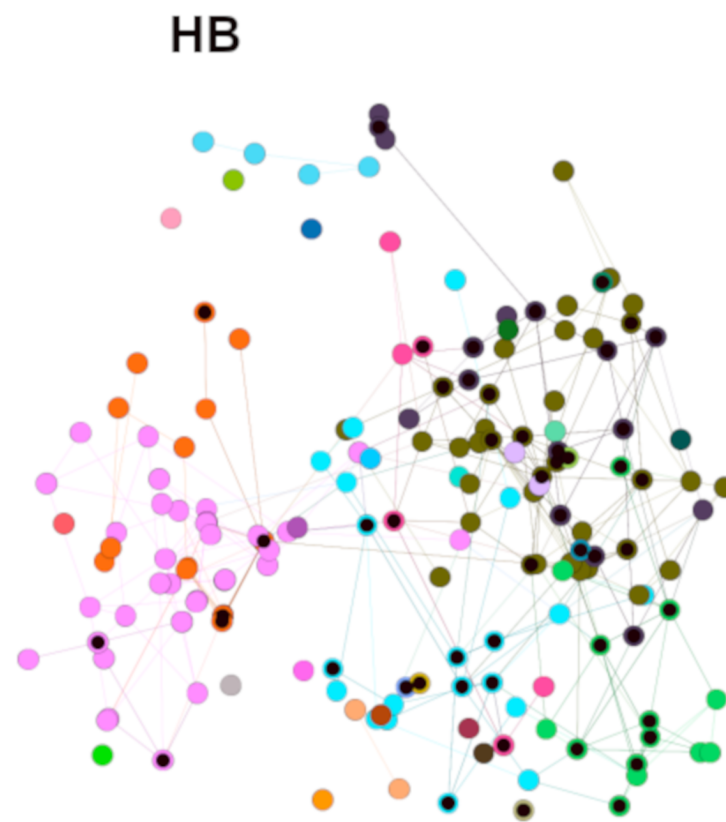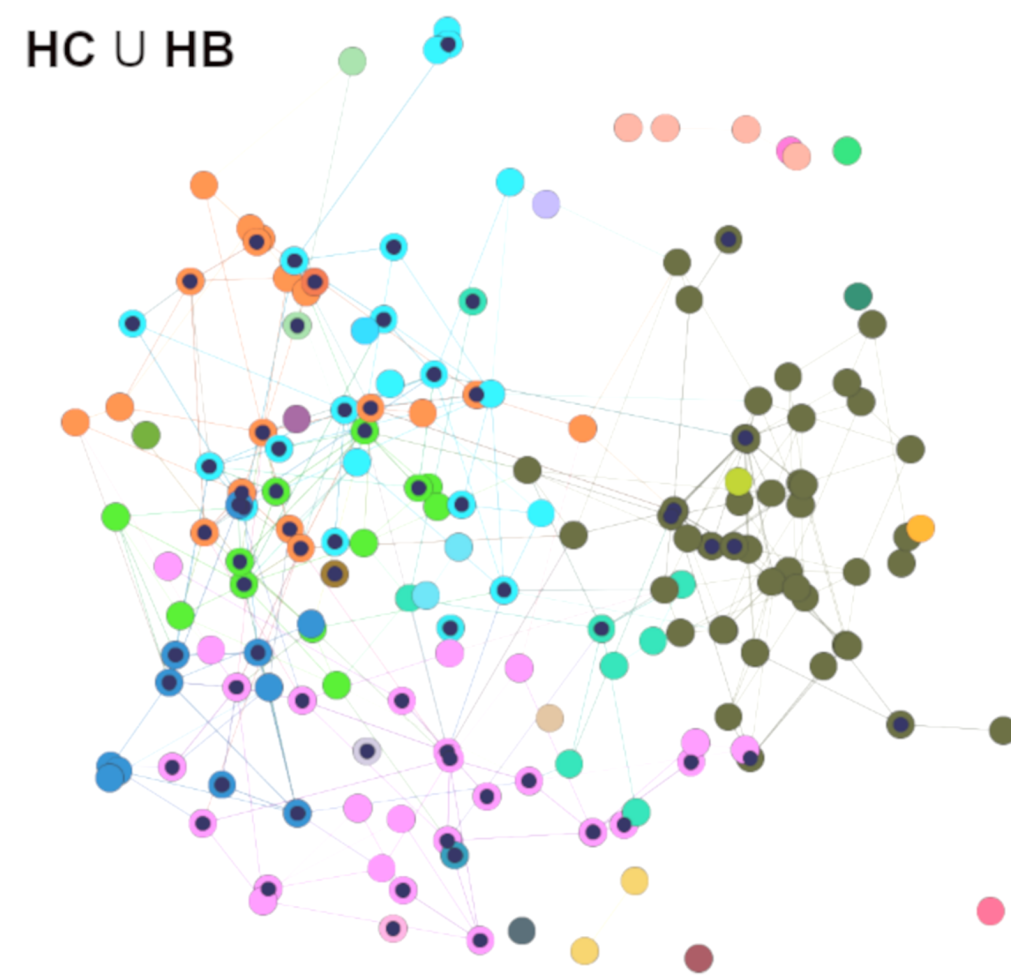

Cutoff=0.35

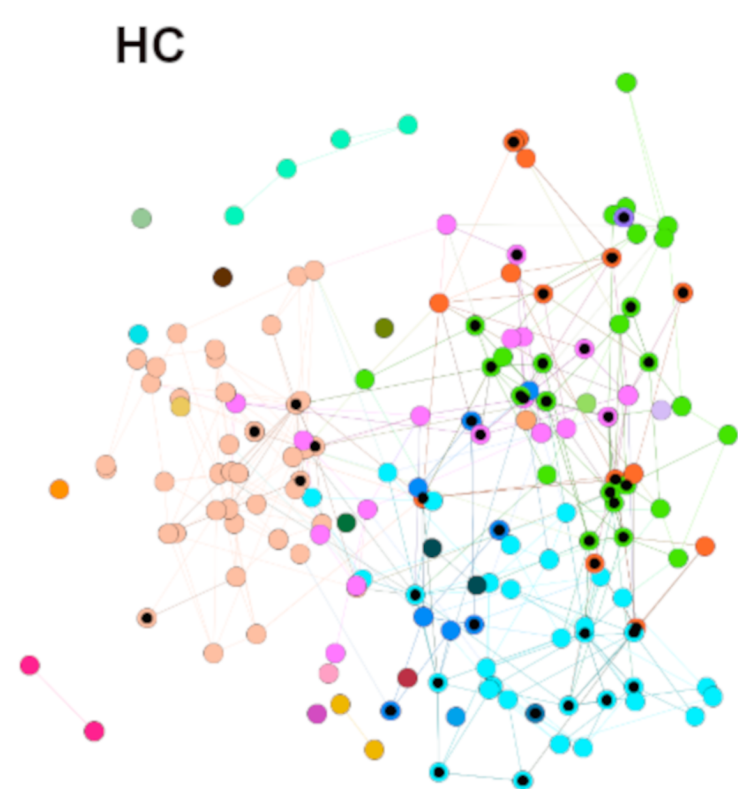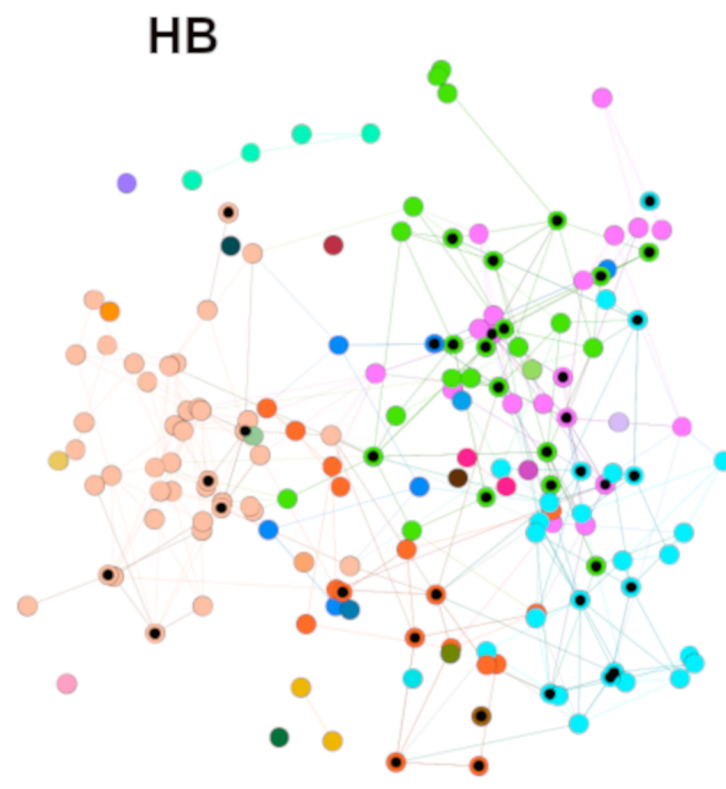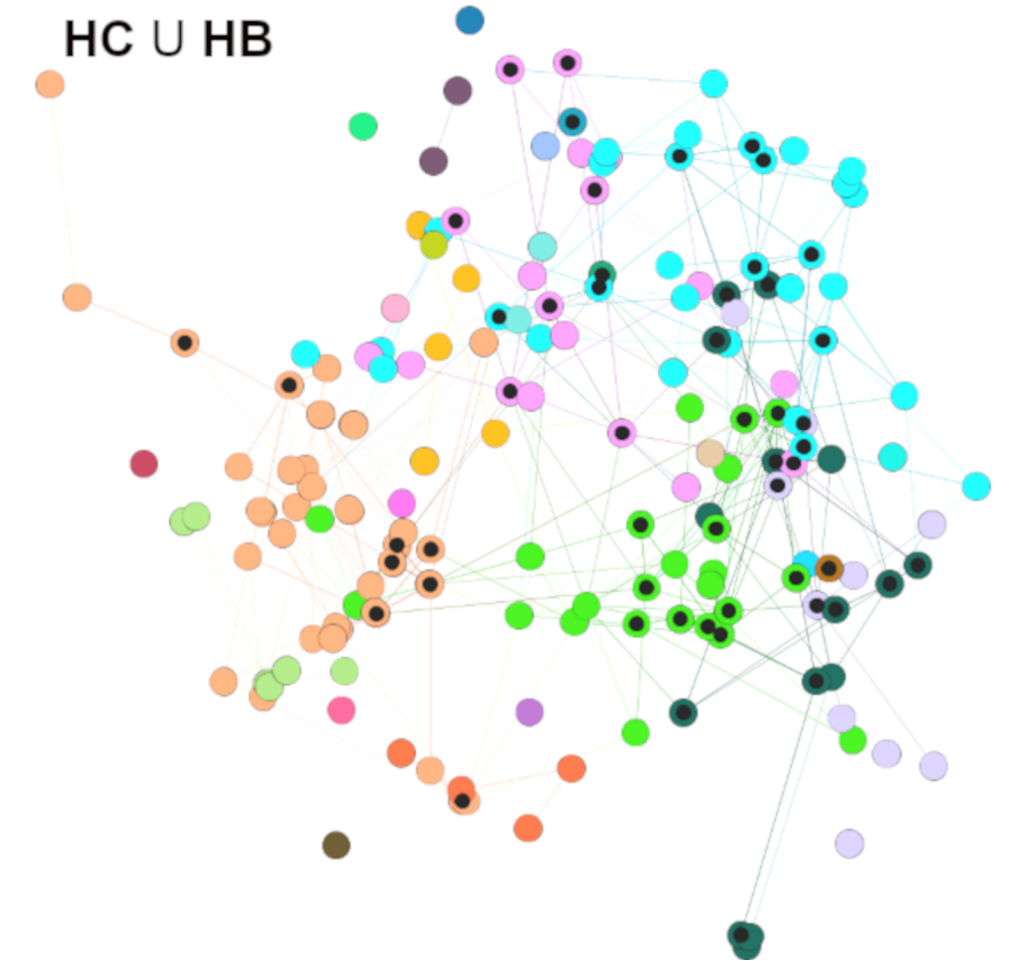

Supplement: s1 [file s1]

**Cluster 4**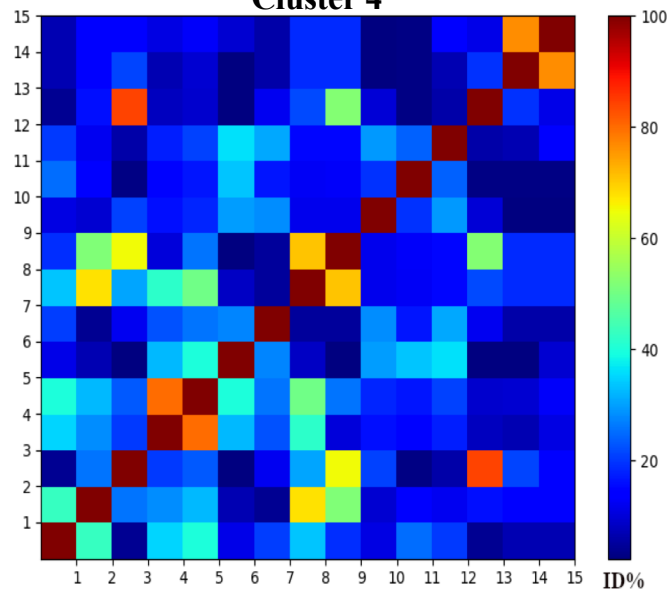**Cluster 7**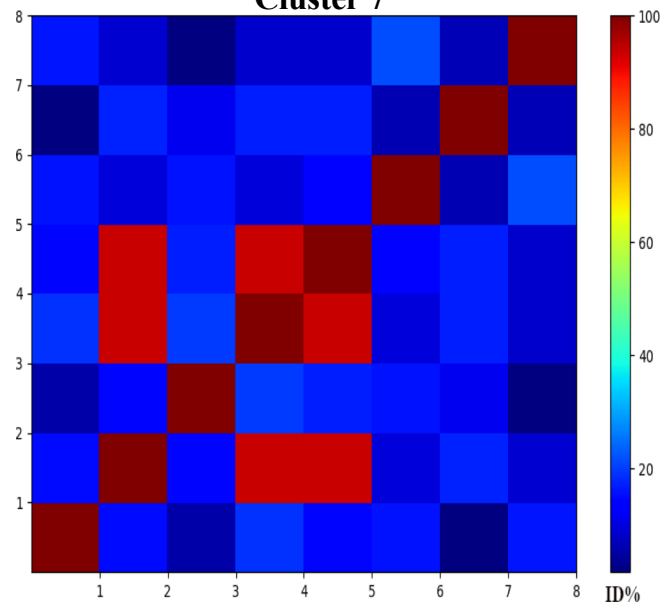**Cluster 9**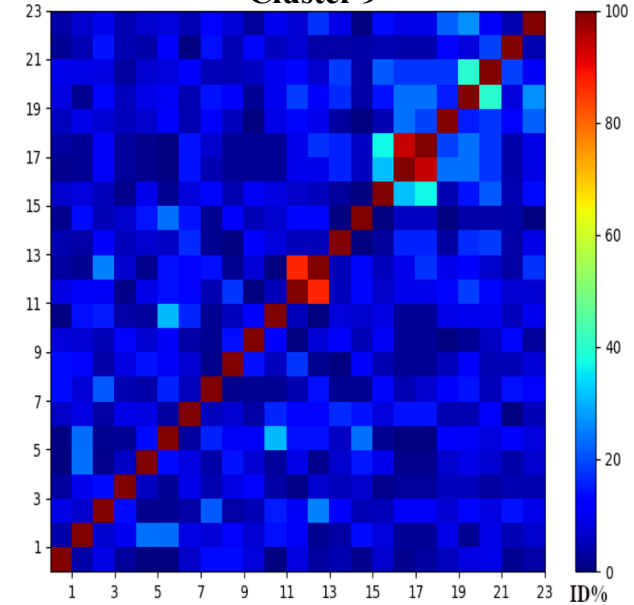**Cluster 11**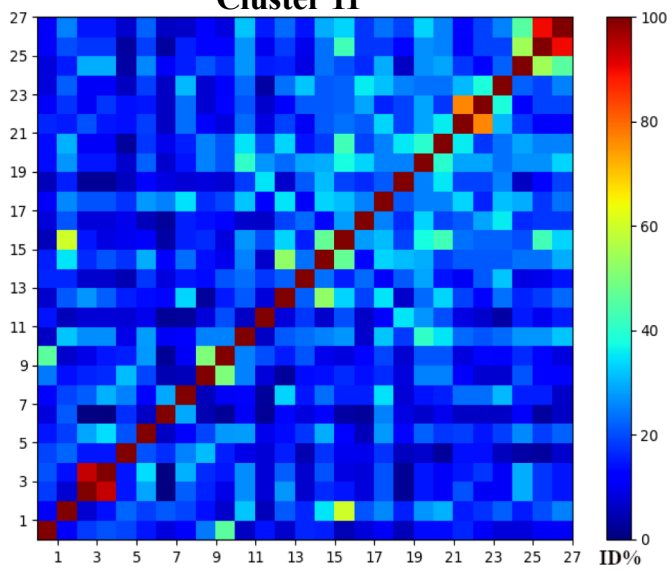**Cluster 14**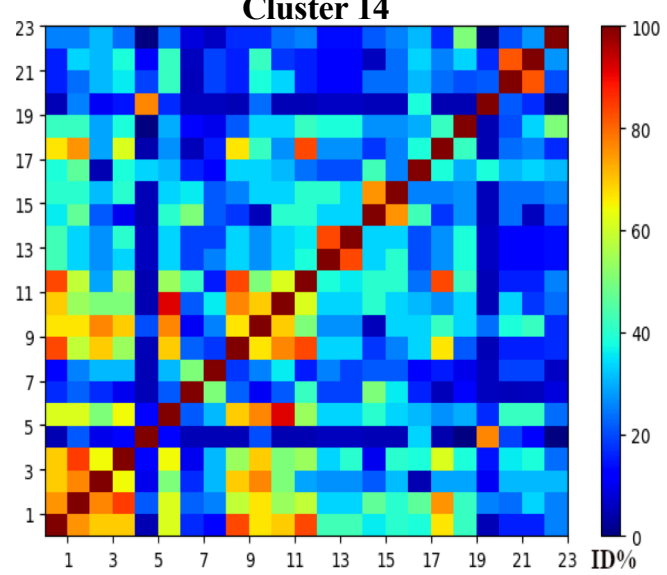**Cluster 15**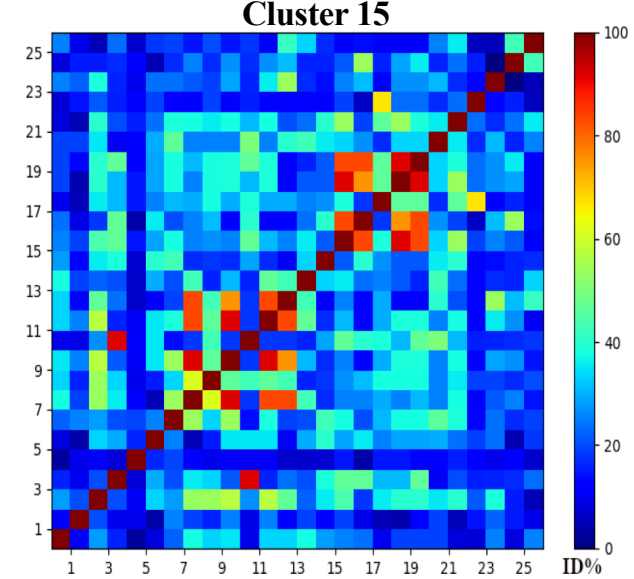**Cluster 17**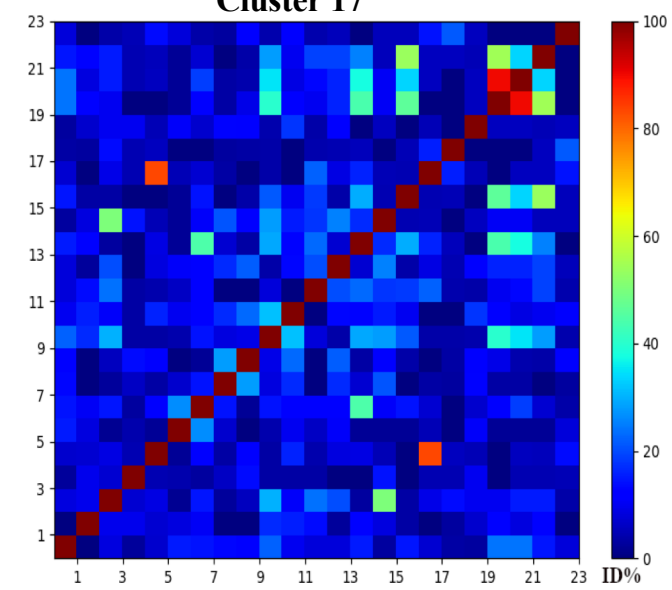**Cluster 22**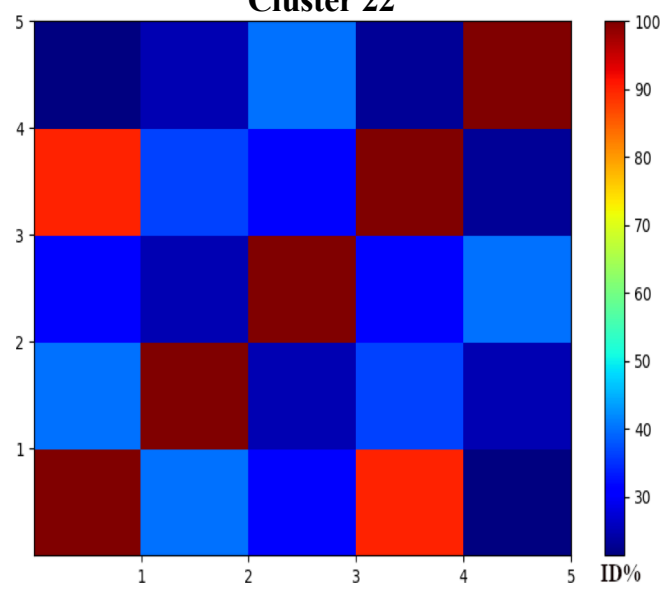**Singletons**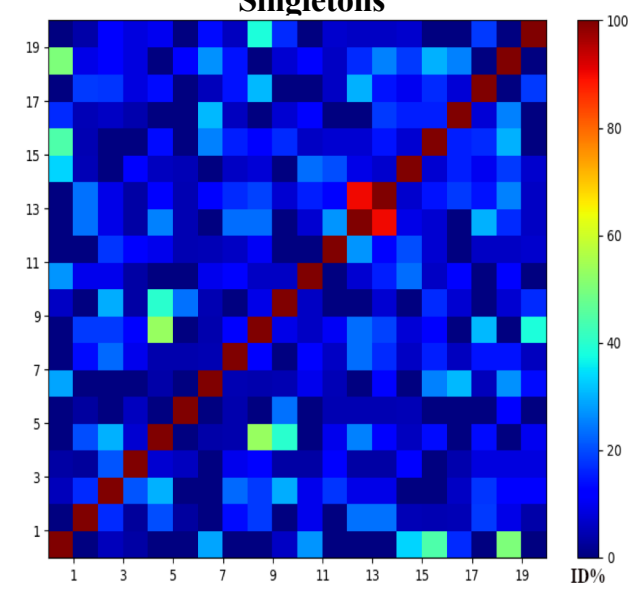

Supplement: s1 [file s1]
